# Supplementary material
Source: MDPI journal article supplement (https://www.mdpi.com/1996-1073/10/9/1434)
Supplement: s1 [file s1]

# Supplementary content

## The economic feasibility of residential energy storage combined with PV panels: the role of subsidies in an European country

Federica Cucchiella \*, Idiano D'Adamo and Massimo Gastaldi

Department of Industrial and Information Engineering and Economics, University of L'Aquila, Via G. Gronchi 18, 67100 L'Aquila, Italy; [idiano.dadamo@univaq.it](mailto:idiano.dadamo@univaq.it) (I.D.); [massimo.gastaldi@univaq.it](mailto:massimo.gastaldi@univaq.it) (M.G.)

\* Correspondence: [federica.cucchiella@univaq.it](mailto:federica.cucchiella@univaq.it) (F.C.); Tel.: +39-0862-434-464

### Mathematical reference model used for the calculation of NPV [3]

$$\text{NPV(PV)} = \text{DCI} - \text{DCO} \quad (1)$$

$$\text{DCI} = \sum_{t=1}^N \frac{\omega_{\text{self},c} \times E_{\text{Out},t} \times p_t^c + \omega_{\text{sold}} \times E_{\text{Out},t} \times p_t^s}{(1+r)^t} + \sum_{t=1}^{N_{\text{TaxD}}} ((C_{\text{inv}}/N_{\text{TaxD}}) \times \text{TaxD}_{\text{u-sr}})/(1+r)^t \quad (2)$$

$$p_{t+1}^c = p_t^c \times (1 + \text{inf}_{\text{el}}); p_{t+1}^s = p_t^s \times (1 + \text{inf}_{\text{el}}) \quad (3)$$

$$\begin{aligned} \text{DCO} = & \sum_{t=0}^{N_{\text{debt}}-1} (C_{\text{inv}}/N_{\text{debt}} + (C_{\text{inv}} - C_{\text{lcs},t}) \times r_d)/(1+r)^t \\ & + \sum_{t=1}^N \frac{P_{\text{Cm}} \times C_{\text{inv}} \times (1 + \text{inf}) + P_{\text{Cass}} \times C_{\text{inv}} \times (1 + \text{inf}) + \text{SP}_{\text{el},t} \times P_{\text{Ctax}}}{(1+r)^t} + \frac{P_{\text{Ci}} \times C_{\text{inv}}}{(1+r)^{10}} + C_{\text{ae}} \end{aligned} \quad (4)$$

$$C_{\text{inv}} = C_{\text{inv,unit}} \times (1 + \text{Vat}) \times P_f \times \eta_f \quad (5)$$

$$E_{\text{Out},t} = t_r \times K_f \times \eta_{\text{lm}} \times \eta_{\text{bos}} \times A_{\text{cell}} \times P_f \times \eta_f \quad (6)$$

$$E_{\text{Out},t+1} = E_{\text{Out},t} \times (1 - dE_f) \quad (7)$$

$$E_{\text{Out}} = \sum_{t=1}^N E_{\text{out},t} \quad (8)$$

where DCI = discounted cash inflows; DCO = discounted cash outflows; t = single period; CI = cash inflows; CO = cash outflows; E<sub>Out</sub> = energy output of the system; C<sub>inv</sub> = total investment cost; C<sub>lcs</sub> = loan capital share cost; SP<sub>el</sub> = sale of energy; η<sub>f</sub> = number of PV modules to be installed and P<sub>f</sub> = nominal power of a PV module. Other economic inputs, used in this analysis, are defined in Table S1.

**Table S1.** Economic inputs [3]

| Acronym                     | Variable                                      | Value                             |
|-----------------------------|-----------------------------------------------|-----------------------------------|
| $A_{\text{cell}}$           | Active surface                                | 7 m <sup>2</sup> /kWp             |
| $C_{\text{ae}}$             | Administrative and electrical connection cost | 250 €                             |
| $C_{\text{inv,unit}}$       | Specific investment cost                      | 1850 €/kW                         |
| $dE_f$                      | Decreased efficiency of a system              | 0.7%                              |
| $\text{inf}$                | Rate of inflation                             | 2%                                |
| $\text{inf}_{\text{el}}$    | Rate of energy inflation                      | 1.5%                              |
| $k_f$                       | Optimum angle of tilt                         | 1.13                              |
| $N$                         | Lifetime of a PV system                       | 20 y                              |
| $N_{\text{debt}}$           | Period of loan                                | 15 y                              |
| $N_{\text{TaxD}}$           | Period of tax deduction                       | 10 y                              |
| $\eta_{\text{bos}}$         | Balance of system efficiency                  | 85%                               |
| $\eta_i$                    | number of PV modules to be installed          | function of S                     |
| $\eta_m$                    | Module efficiency                             | 16%                               |
| $p^c$                       | Electricity purchase price                    | 19 cent €/kWh                     |
| $p^s$                       | Electricity sales price                       | 9.8–10.9 cent €/kWh               |
| $P_{\text{Cass}}$           | Percentage of assurance cost                  | 0.4%                              |
| $P_{\text{Ci}}$             | Percentage of inverter cost                   | 15%                               |
| $P_{\text{Cm}}$             | Percentage of maintenance cost                | 1%                                |
| $P_{\text{Ctax}}$           | Percentage of taxes cost                      | 43.5%                             |
| $P_i$                       | nominal power of a PV module                  | function of S                     |
| $r$                         | Opportunity cost of capital                   | 5%                                |
| $r_d$                       | Interest rate on a loan                       | 3%                                |
| $t_r$                       | Average annual insolation                     | 1350–1550 kWh/(m <sup>2</sup> ×y) |
| $S$                         | Size                                          | 1–6 kW                            |
| $\text{TaxD}_{\text{u-br}}$ | Specific tax deduction (baseline rate)        | 36%                               |
| $\text{TaxD}_{\text{u-sr}}$ | Specific tax deduction (subsidized rate)      | 50%                               |
| $\omega_{\text{self,c}}$    | Percentage of energy self-consumption         | 30–50%                            |
| $\omega_{\text{sold}}$      | Percentage of the produced energy sold        | 50–70%                            |
| $\text{Vat}$                | Value added tax                               | 10%                               |
